# Supplementary material
Source: ML conference proceedings conference paper supplement (https://aclanthology.org/2026.bionlp-2.18)
Supplement: SupplementaryMaterial [file fig_cm_after_postprocessing.pdf › fig_cm_after_postprocessing.pdf]

# Approximate Normalised Confusion Matrix (Final System, OOF)

True Defense Level

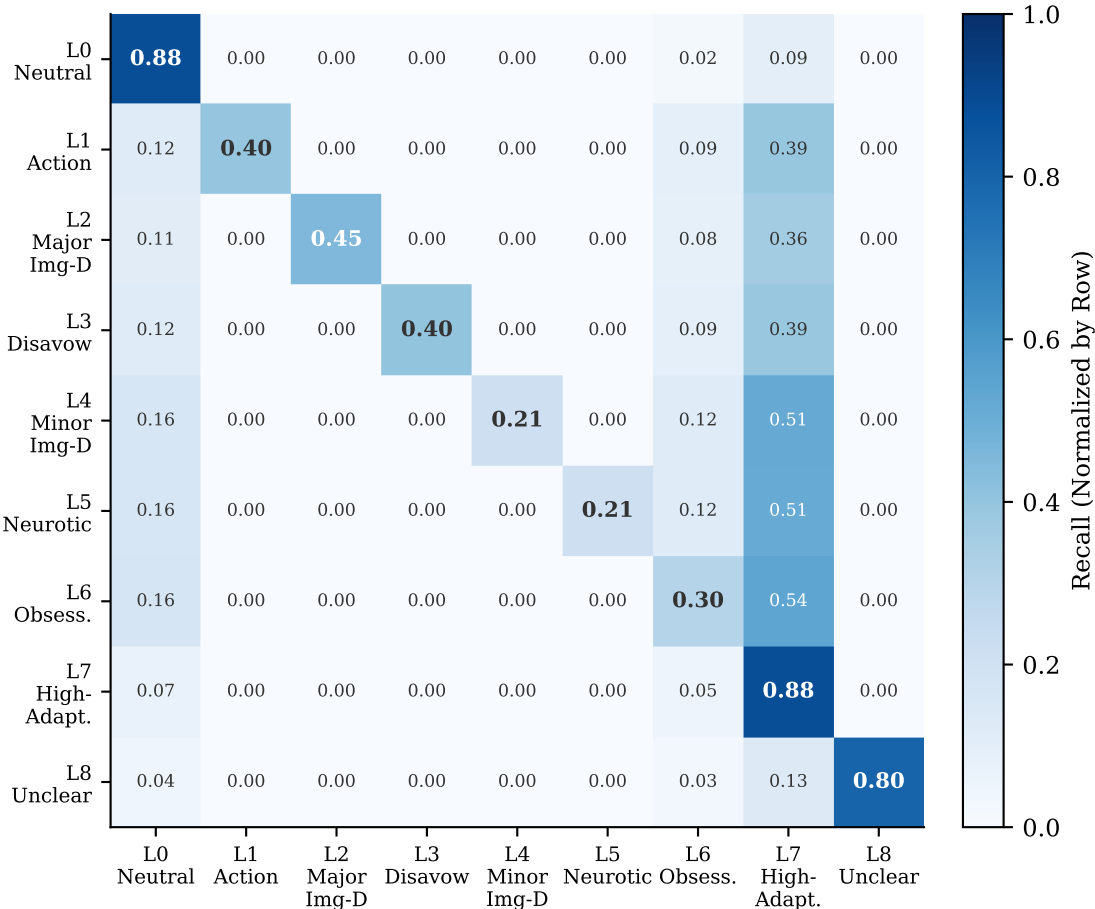

Recall (Normalized by Row)
