# Supplementary material
Source: ML conference proceedings conference paper supplement (https://aclanthology.org/2026.bionlp-2.18)

# Normalized Confusion Matrix (OOF)

True Defense Level

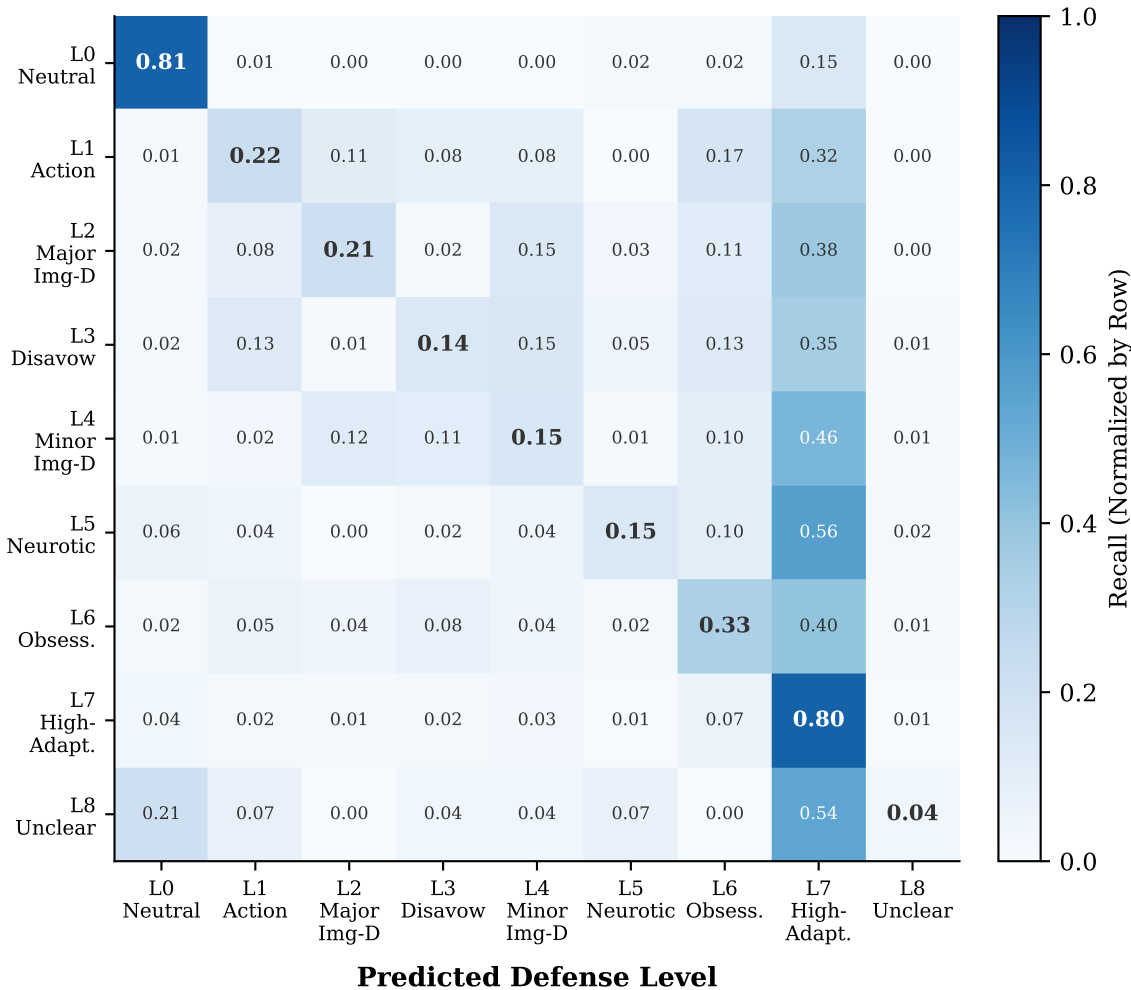

Supplement: SupplementaryMaterial [file fig_cm_before_postprocessing.pdf › fig_cm_before_postprocessing.pdf]

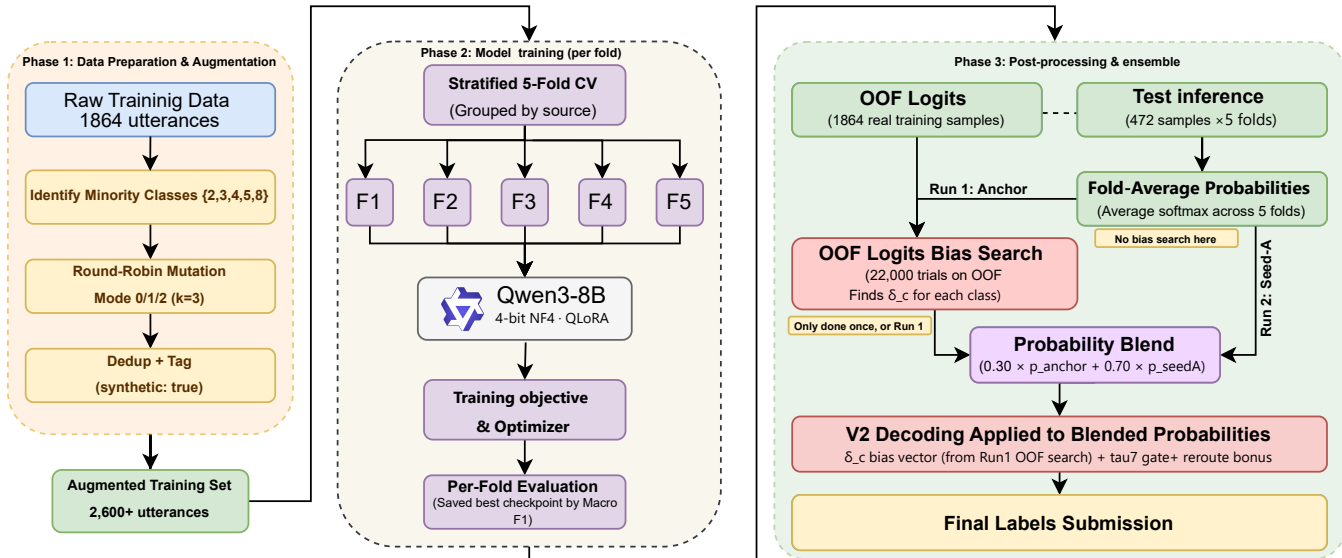

Supplement: SupplementaryMaterial [file psydefdetect diagram.drawio (2).pdf › psydefdetect diagram.drawio (2).pdf]

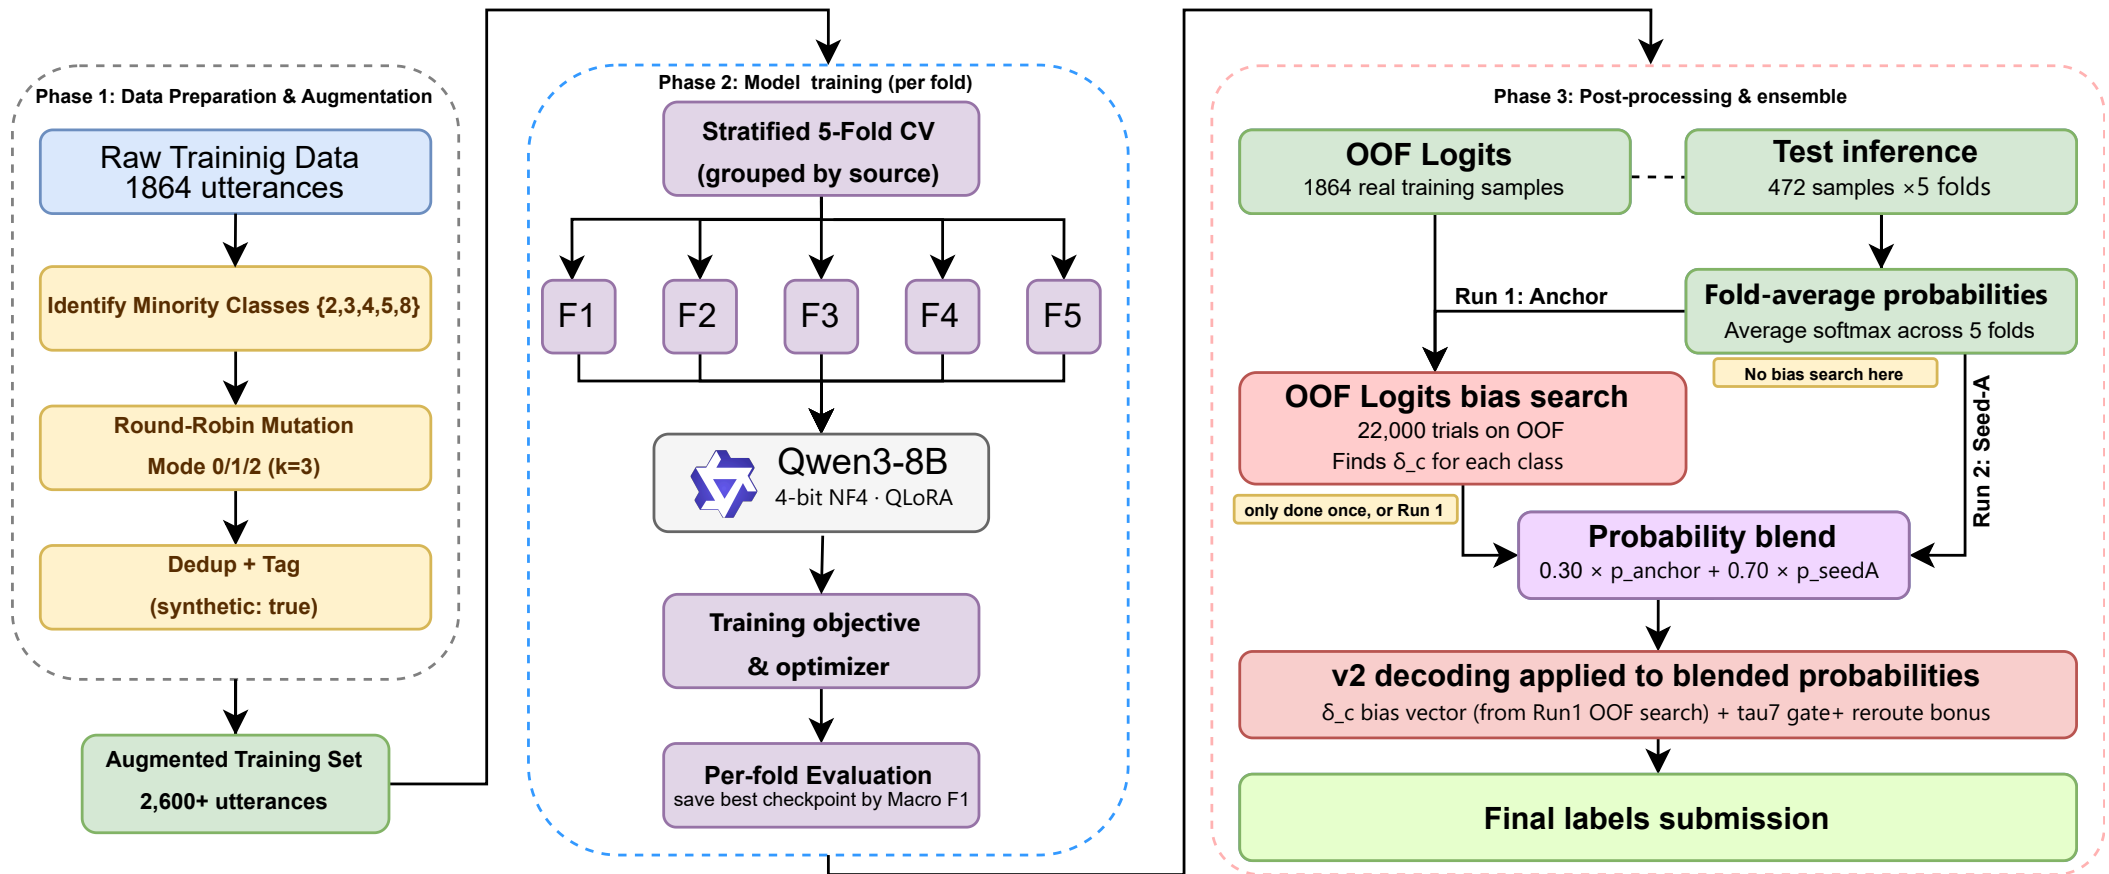

Supplement: SupplementaryMaterial [file psydefdetect diagram.drawio.pdf › psydefdetect diagram.drawio.pdf]
